# Supplementary material for: Proteome Analysis of the Gametophytes of a Western Himalayan Fern Diplazium maximum Reveals Their Adaptive Responses to Changes in Their Micro-Environment
Source: Front Plant Sci. 2019 Dec 17;10:1623. doi: 10.3389/fpls.2019.01623 (PMC6928197; doi:10.3389/fpls.2019.01623)
Supplement: Table S5 — Tair annotation of identified proteins and their description for protein protein interaction network [file Table_5.xlsx]

## Sheet: Tair annotation
Table S5 Tair annotation of identified proteins and their description for protein protein interaction network
Protein ID	len	TAIR ID	TAIR Annoatation	length	% iden	qcovs	e-value	bit score
XP_024625966.1	399	AT2G39490.1	AT2G39490.1 | Symbols: | F-box family protein | chr2:16487151-16488464 REVERSE LENGTH=387	386	37.565	93	1.96e-71	229
XP_023880125.1	980	AT1G31730.1	AT1G31730.1 | Symbols: | Adaptin family protein | chr1:11359907-11363916 FORWARD LENGTH=938	983	72.431	100	0	1410
XP_020887398.1	633	AT2G18330.1	AT2G18330.1 | Symbols: | AAA-type ATPase family protein | chr2:7965829-7968915 FORWARD LENGTH=636	635	97.48	99	0	1273
XP_021659116.1	648	AT3G12580.1	AT3G12580.1 | Symbols: HSP70, ATHSP70 | heat shock protein 70 | chr3:3991487-3993689 REVERSE LENGTH=650	650	93.538	100	0	1246
XP_021665185.1	742	AT5G04130.1	AT5G04130.1 | Symbols: GYRB2 | DNA GYRASE B2 | chr5:1122084-1128031 REVERSE LENGTH=732	685	79.27	92	0	1107
KDP38702.1	626	AT1G16030.1	AT1G16030.1 | Symbols: Hsp70b | heat shock protein 70B | chr1:5502386-5504326 REVERSE LENGTH=646	657	79.604	100	0	1072
XP_024046352.1	810	AT5G23430.1	AT5G23430.1 | Symbols: | Transducin/WD40 repeat-like superfamily protein | chr5:7894073-7899862 REVERSE LENGTH=837	841	66.468	100	0	1071
XP_024038766.1	624	AT1G71820.1	AT1G71820.1 | Symbols: SEC6 | SEC6 | chr1:27010022-27016745 FORWARD LENGTH=752	624	77.083	100	0	982
XP_004135069.1	558	AT5G08680.1	AT5G08680.1 | Symbols: | ATP synthase alpha/beta family protein | chr5:2821992-2824683 FORWARD LENGTH=559	534	86.142	95	0	929
XP_022135714.1	955	AT1G78610.1	AT1G78610.1 | Symbols: MSL6 | mechanosensitive channel of small conductance-like 6 | chr1:29569226-29572126 REVERSE LENGTH=856	904	56.195	93	0	914
XP_013605059.1	618	AT1G12300.1	AT1G12300.1 | Symbols: | Tetratricopeptide repeat (TPR)-like superfamily protein | chr1:4184163-4186076 REVERSE LENGTH=637	623	69.823	97	0	880
YP_009425181.1	506	ATCG00120.1	ATCG00120.1 | Symbols: ATPA | ATP synthase subunit alpha | chrC:9938-11461 REVERSE LENGTH=507	502	84.462	99	0	856
ABG48669.1	443	ATCG00490.1	ATCG00490.1 | Symbols: RBCL | ribulose-bisphosphate carboxylases | chrC:54958-56397 FORWARD LENGTH=479	443	93.454	100	0	851
XP_018481299.1	498	AT2G34180.1	AT2G34180.1 | Symbols: CIPK13, SnRK3.7, WL2, ATWL2 | CBL-interacting protein kinase 13 | chr2:14430761-14432269 REVERSE LENGTH=502	499	85.571	100	0	842
XP_022002049.1	530	AT5G66210.1	AT5G66210.1 | Symbols: CPK28 | calcium-dependent protein kinase 28 | chr5:26456681-26459434 REVERSE LENGTH=523	526	76.996	99	0	830
KCW70512.1	399	AT4G38510.5	AT4G38510.5 | Symbols: | ATPase, V1 complex, subunit B protein | chr4:18011155-18014897 REVERSE LENGTH=494	398	95.729	99	0	797
XP_020577625.1	524	AT1G05180.1	AT1G05180.1 | Symbols: AXR1 | NAD(P)-binding Rossmann-fold superfamily protein | chr1:1498357-1501775 REVERSE LENGTH=540	521	67.754	99	0	761
XP_022854244.1	419	AT1G09840.6	AT1G09840.6 | Symbols: ATSK41, SK41 | shaggy-like protein kinase 41 | chr1:3196114-3199524 REVERSE LENGTH=421	422	85.308	100	0	760
XP_010032628.1	885	AT3G51550.1	AT3G51550.1 | Symbols: FER | Malectin/receptor-like protein kinase family protein | chr3:19117877-19120564 REVERSE LENGTH=895	805	51.304	88	0	755
EMS48081.1	751	AT1G12360.1	AT1G12360.1 | Symbols: KEU | Sec1/munc18-like (SM) proteins superfamily | chr1:4201172-4206144 FORWARD LENGTH=666	682	55.425	85	0	724
XP_010519887.1	572	AT5G11610.1	AT5G11610.1 | Symbols: | Exostosin family protein | chr5:3735569-3737952 REVERSE LENGTH=546	576	64.757	99	0	720
XP_024521402.1	671	AT2G39730.1	AT2G39730.1 | Symbols: RCA | rubisco activase | chr2:16570951-16573345 REVERSE LENGTH=474	453	73.51	80	0	692
OAY63375.1	480	AT3G24503.1	AT3G24503.1 | Symbols: ALDH2C4, ALDH1A, REF1 | aldehyde dehydrogenase 2C4 | chr3:8919732-8923029 REVERSE LENGTH=501	490	67.755	99	0	691
ADQ64354.1	359	ATCG00480.1	ATCG00480.1 | Symbols: ATPB, PB | ATP synthase subunit beta | chrC:52660-54156 REVERSE LENGTH=498	359	93.872	100	0	666
XP_006340862.1	446	AT4G35500.1	AT4G35500.1 | Symbols: | Protein kinase superfamily protein | chr4:16857475-16859407 FORWARD LENGTH=438	445	71.91	99	0	665
XP_010108696.1	536	AT1G26760.1	AT1G26760.1 | Symbols: ATXR1, SDG35 | SET domain protein 35 | chr1:9248304-9249941 REVERSE LENGTH=545	531	60.452	98	0	635
NP_193341.3	289	AT4G16060.1	AT4G16060.1 | Symbols: | unknown protein; FUNCTIONS IN: molecular_function unknown; INVOLVED IN: biological_process unknown; LOCATED IN: chloroplast, chloroplast stroma; EXPRESSED IN: 22 plant structures; EXPRESSED DURING: 13 growth stages; Has 42 Blast hits to 42 proteins in 16 species: Archae - 0; Bacteria - 2; Metazoa - 0; Fungi - 0; Plants - 33; Viruses - 0; Other Eukaryotes - 7 (source: NCBI…	289	100	100	0	587
PON71702.1	523	AT4G33050.3	AT4G33050.3 | Symbols: EDA39 | calmodulin-binding family protein | chr4:15944604-15946736 REVERSE LENGTH=488	493	61.258	90	0	566
ABD64648.1	488	ATCG00040.1	ATCG00040.1 | Symbols: MATK | maturase K | chrC:2056-3636 REVERSE LENGTH=526	489	58.691	99	0	551
OMO74899.1	373	AT2G26560.1	AT2G26560.1 | Symbols: PLP2, PLA IIA, PLA2A | phospholipase A 2A | chr2:11293912-11295708 REVERSE LENGTH=407	356	68.539	95	5.17e-180	505
XP_017233924.1	1224	AT5G04290.1	AT5G04290.1 | Symbols: KTF1, SPT5L | kow domain-containing transcription factor 1 | chr5:1196069-1202653 FORWARD LENGTH=1493	692	38.584	54	1.99e-146	479
XP_015644468.1	386	AT4G37880.1	AT4G37880.1 | Symbols: | LisH/CRA/RING-U-box domains-containing protein | chr4:17810183-17811349 FORWARD LENGTH=388	389	52.699	100	1.57e-146	420
XP_022926861.1	212	AT4G17170.1	AT4G17170.1 | Symbols: AT-RAB2, ATRABB1C, ATRAB2A, RAB2A, RABB1C, ATRAB-B1B, RAB-B1B | RAB GTPase homolog B1C | chr4:9644908-9646220 REVERSE LENGTH=211	210	93.81	99	5.68e-152	420
XP_017636994.1	350	AT5G09280.1	AT5G09280.1 | Symbols: | Pectin lyase-like superfamily protein | chr5:2880423-2881597 REVERSE LENGTH=297	254	74.016	73	6.49e-145	411
XP_003575246.1	210	AT4G17170.1	AT4G17170.1 | Symbols: AT-RAB2, ATRABB1C, ATRAB2A, RAB2A, RABB1C, ATRAB-B1B, RAB-B1B | RAB GTPase homolog B1C | chr4:9644908-9646220 REVERSE LENGTH=211	210	93.333	99	1.65e-147	408
XP_012461079.1	389	AT5G57770.1	AT5G57770.1 | Symbols: | Plant protein of unknown function (DUF828) with plant pleckstrin homology-like region | chr5:23401094-23403112 REVERSE LENGTH=406	380	61.316	95	3.92e-141	407
XP_019449246.1	337	AT1G30040.1	AT1G30040.1 | Symbols: ATGA2OX2, GA2OX2 | gibberellin 2-oxidase | chr1:10537769-10539570 FORWARD LENGTH=341	336	59.226	99	1.95e-140	401
XP_020256486.1	326	AT3G01190.1	AT3G01190.1 | Symbols: | Peroxidase superfamily protein | chr3:67236-68477 REVERSE LENGTH=321	311	60.129	95	4.47e-133	381
CDP20718.1	447	AT5G22320.1	AT5G22320.1 | Symbols: | Leucine-rich repeat (LRR) family protein | chr5:7388175-7390426 REVERSE LENGTH=452	266	63.534	59	1.13e-109	331
AGC70797.1	505	ATCG00040.1	ATCG00040.1 | Symbols: MATK | maturase K | chrC:2056-3636 REVERSE LENGTH=526	294	60.544	81	2.05e-104	322
XP_011398343.1	296	AT1G60710.1	AT1G60710.1 | Symbols: ATB2 | NAD(P)-linked oxidoreductase superfamily protein | chr1:22355073-22356627 REVERSE LENGTH=345	271	60.886	91	7.07e-110	322
XP_024462584.1	408	AT2G30580.1	AT2G30580.1 | Symbols: DRIP2 | DREB2A-interacting protein 2 | chr2:13026444-13030363 FORWARD LENGTH=420	441	43.764	95	3.3e-107	322
XP_019196546.1	675	AT5G55660.1	AT5G55660.1 | Symbols: | DEK domain-containing chromatin associated protein | chr5:22539375-22543142 FORWARD LENGTH=778	501	47.106	72	3.76e-97	316
XP_003571891.1	174	AT1G60430.2	AT1G60430.2 | Symbols: ARPC3 | actin-related protein C3 | chr1:22264797-22265682 REVERSE LENGTH=174	174	83.333	100	2.9e-112	316
XP_010466466.1	262	AT3G21990.1	AT3G21990.1 | Symbols: | Domain of unknown function (DUF26) | chr3:7749413-7750419 FORWARD LENGTH=256	250	58.8	95	7.18e-104	302
XP_010532728.1	195	AT2G43760.3	AT2G43760.3 | Symbols: | molybdopterin biosynthesis MoaE family protein | chr2:18133276-18133872 FORWARD LENGTH=198	196	75.51	99	1.08e-103	296
ADK27707.1	244	AT1G59960.1	AT1G59960.1 | Symbols: | NAD(P)-linked oxidoreductase superfamily protein | chr1:22071410-22073067 REVERSE LENGTH=326	244	52.459	100	6.38e-95	281
ONK80680.1	314	AT4G04480.1	AT4G04480.1 | Symbols: | unknown protein; LOCATED IN: chloroplast; EXPRESSED IN: flower, pollen tube; EXPRESSED DURING: petal differentiation and expansion stage; BEST Arabidopsis thaliana protein match is: F-box family protein with a domain of unknown function (DUF295) (TAIR:AT4G22030.1); Has 78 Blast hits to 78 proteins in 10 species: Archae - 0; Bacteria - 0; Metazoa - 0; Fungi - 0; Plants - 7…	307	43.974	97	1.39e-84	260
EMS66681.1	415	AT1G17450.2	AT1G17450.2 | Symbols: | B-block binding subunit of TFIIIC | chr1:5988579-5996693 REVERSE LENGTH=1844	400	42.25	92	5.58e-77	260
XP_024632479.1	367	AT4G21470.1	AT4G21470.1 | Symbols: ATFMN/FHY, FMN/FHY | riboflavin kinase/FMN hydrolase | chr4:11431284-11433197 FORWARD LENGTH=379	361	42.105	94	3.17e-82	255
XP_015689016.1	361	AT4G31860.1	AT4G31860.1 | Symbols: | Protein phosphatase 2C family protein | chr4:15406685-15408589 REVERSE LENGTH=357	366	39.617	95	1.03e-77	243
XP_020520500.1	188	AT2G18250.1	AT2G18250.1 | Symbols: ATCOAD, COAD | 4-phosphopantetheine adenylyltransferase | chr2:7940025-7941499 FORWARD LENGTH=176	165	68.485	88	1.47e-80	237
XP_002984487.1	184	AT5G13070.1	AT5G13070.1 | Symbols: | MSF1-like family protein | chr5:4148216-4149062 FORWARD LENGTH=183	181	56.906	98	1.03e-79	234
KVI04283.1	385	AT1G03790.1	AT1G03790.1 | Symbols: SOM | Zinc finger C-x8-C-x5-C-x3-H type family protein | chr1:954589-955770 FORWARD LENGTH=393	421	40.618	100	1.61e-72	231
XP_004147911.1	143	AT1G53540.1	AT1G53540.1 | Symbols: | HSP20-like chaperones superfamily protein | chr1:19980510-19980983 FORWARD LENGTH=157	157	66.242	100	2.45e-71	211
KVH06262.1	354	AT2G26710.1	AT2G26710.1 | Symbols: BAS1, CYP734A1, CYP72B1 | Cytochrome P450 superfamily protein | chr2:11380700-11383413 FORWARD LENGTH=520	318	36.164	97	5.33e-64	211
PKI69014.1	171	AT1G03900.1	AT1G03900.1 | Symbols: ATNAP4, NAP4 | non-intrinsic ABC protein 4 | chr1:991252-992852 FORWARD LENGTH=272	142	69.014	83	3.13e-68	208
XP_020209750.1	165	AT2G30230.1	AT2G30230.1 | Symbols: | unknown protein; FUNCTIONS IN: molecular_function unknown; INVOLVED IN: biological_process unknown; LOCATED IN: endomembrane system; BEST Arabidopsis thaliana protein match is: unknown protein (TAIR:AT1G06980.1); Has 167 Blast hits to 167 proteins in 14 species: Archae - 0; Bacteria - 0; Metazoa - 0; Fungi - 0; Plants - 167; Viruses - 0; Other Eukaryotes - 0 (source: NCBI…	179	55.307	100	9.89e-58	178
XP_013721574.1	250	AT3G47680.1	AT3G47680.1 | Symbols: | DNA binding | chr3:17577483-17578391 REVERSE LENGTH=302	261	39.08	85	4.13e-54	176
OAE29553.1	686	AT4G00290.1	AT4G00290.1 | Symbols: | Mechanosensitive ion channel protein | chr4:123097-125300 REVERSE LENGTH=497	297	30.976	43	3.78e-47	174
XP_013594423.1	161	AT4G21745.1	AT4G21745.1 | Symbols: | PAK-box/P21-Rho-binding family protein | chr4:11549340-11550415 FORWARD LENGTH=156	161	63.975	100	2.24e-56	174
PUZ47967.1	715	AT1G04790.1	AT1G04790.1 | Symbols: | RING/U-box superfamily protein | chr1:1345469-1348143 FORWARD LENGTH=634	285	37.544	32	7.73e-46	173
BAJ94776.1	184	AT1G07180.1	AT1G07180.1 | Symbols: ATNDI1, NDA1 | alternative NAD(P)H dehydrogenase 1 | chr1:2204414-2206773 FORWARD LENGTH=510	116	70.69	63	3.08e-51	171
PSR94704.1	119	AT2G31400.1	AT2G31400.1 | Symbols: GUN1 | genomes uncoupled 1 | chr2:13387201-13390550 REVERSE LENGTH=918	98	75.51	82	4.35e-48	164
XP_022002381.1	297	AT3G11964.1	AT3G11964.1 | Symbols: | RNA binding;RNA binding | chr3:3793957-3806626 REVERSE LENGTH=1896	151	51.656	44	2e-45	164
XP_013633432.1	131	AT5G03540.2	AT5G03540.2 | Symbols: ATEXO70A1, EXO70A1 | exocyst subunit exo70 family protein A1 | chr5:890194-893916 FORWARD LENGTH=523	73	95.89	56	2.3e-43	148
XP_017244919.1	166	AT1G73530.1	AT1G73530.1 | Symbols: | RNA-binding (RRM/RBD/RNP motifs) family protein | chr1:27643801-27645386 REVERSE LENGTH=181	90	68.889	54	5.59e-43	140
XP_015055115.1	117	AT3G52590.1	AT3G52590.1 | Symbols: UBQ1, EMB2167, ERD16, HAP4 | ubiquitin extension protein 1 | chr3:19505668-19506681 FORWARD LENGTH=128	96	67.708	82	1.21e-39	128
CAN65323.1	82	AT1G30040.1	AT1G30040.1 | Symbols: ATGA2OX2, GA2OX2 | gibberellin 2-oxidase | chr1:10537769-10539570 FORWARD LENGTH=341	79	68.354	96	1.24e-35	122
CAI96506.1	218	AT5G51440.1	AT5G51440.1 | Symbols: | HSP20-like chaperones superfamily protein | chr5:20891242-20892013 FORWARD LENGTH=210	221	37.557	100	1.93e-31	114
YP_009424121.1	100	ATCG00330.1	ATCG00330.1 | Symbols: RPS14 | chloroplast ribosomal protein S14 | chrC:36938-37240 REVERSE LENGTH=100	100	59	100	3.85e-34	113
CAM96555.1	215	AT4G25200.1	AT4G25200.1 | Symbols: ATHSP23.6-MITO, HSP23.6-MITO | mitochondrion-localized small heat shock protein 23.6 | chr4:12917089-12917858 FORWARD LENGTH=210	224	41.518	100	1.55e-30	111
XP_009382034.1	122	AT5G66170.3	AT5G66170.3 | Symbols: STR18 | sulfurtransferase 18 | chr5:26447828-26448586 FORWARD LENGTH=136	111	46.847	89	4.66e-32	110
XP_019195283.1	187	AT5G39670.1	AT5G39670.1 | Symbols: | Calcium-binding EF-hand family protein | chr5:15883270-15883884 FORWARD LENGTH=204	197	40.102	100	1.35e-30	110
XP_012438336.1	96	AT3G05330.1	AT3G05330.1 | Symbols: ATN, ATTAN | cyclin family | chr3:1519162-1521159 REVERSE LENGTH=444	96	56.25	100	1.46e-29	108
XP_012462101.1	238	AT3G06790.2	AT3G06790.2 | Symbols: | plastid developmental protein DAG, putative | chr3:2144564-2145743 REVERSE LENGTH=244	82	58.537	66	3.62e-26	102
EMS54852.1	189	AT5G51440.1	AT5G51440.1 | Symbols: | HSP20-like chaperones superfamily protein | chr5:20891242-20892013 FORWARD LENGTH=210	144	43.056	76	1.24e-25	98.2
XP_023764365.1	157	AT1G01840.1	AT1G01840.1 | Symbols: | unknown protein; Has 23 Blast hits to 23 proteins in 9 species: Archae - 0; Bacteria - 0; Metazoa - 0; Fungi - 0; Plants - 23; Viruses - 0; Other Eukaryotes - 0 (source: NCBI BLink). | chr1:303650-304108 FORWARD LENGTH=152	165	40	100	1.21e-26	98.2
XP_017256050.1	1188	AT4G29090.1	AT4G29090.1 | Symbols: | Ribonuclease H-like superfamily protein | chr4:14333528-14335255 FORWARD LENGTH=575	591	23.35	48	1.42e-20	97.4
XP_010932647.1	272	AT2G27140.1	AT2G27140.1 | Symbols: | HSP20-like chaperones superfamily protein | chr2:11598496-11599264 REVERSE LENGTH=224	112	42.857	41	2.14e-23	95.1
PKI41933.1	165	AT3G29785.1	AT3G29785.1 | Symbols: | unknown protein; Has 90 Blast hits to 90 proteins in 7 species: Archae - 0; Bacteria - 0; Metazoa - 0; Fungi - 0; Plants - 90; Viruses - 0; Other Eukaryotes - 0 (source: NCBI BLink). | chr3:11612357-11612686 REVERSE LENGTH=109	77	53.247	47	8.85e-24	89.7
KOM38444.1	188	AT5G40840.1	AT5G40840.1 | Symbols: SYN2, AtRAD21.1 | Rad21/Rec8-like family protein | chr5:16359611-16363722 REVERSE LENGTH=809	100	47	49	2.57e-19	84.7
XP_022772481.1	2376	AT1G76740.1	AT1G76740.1 | Symbols: | unknown protein; BEST Arabidopsis thaliana protein match is: unknown protein (TAIR:AT1G76840.1); Has 3683 Blast hits to 2942 proteins in 407 species: Archae - 9; Bacteria - 440; Metazoa - 1472; Fungi - 269; Plants - 192; Viruses - 8; Other Eukaryotes - 1293 (source: NCBI BLink). | chr1:28805235-28810477 FORWARD LENGTH=1532	109	42.202	5	4.54e-14	78.6
PNR33720.1	46	AT2G25900.2	AT2G25900.2 | Symbols: ATCTH | Zinc finger C-x8-C-x5-C-x3-H type family protein | chr2:11041817-11042764 FORWARD LENGTH=315	46	58.696	100	4.18e-13	60.5
XP_020242387.1	147	AT3G29785.1	AT3G29785.1 | Symbols: | unknown protein; Has 90 Blast hits to 90 proteins in 7 species: Archae - 0; Bacteria - 0; Metazoa - 0; Fungi - 0; Plants - 90; Viruses - 0; Other Eukaryotes - 0 (source: NCBI BLink). | chr3:11612357-11612686 REVERSE LENGTH=109	84	35.714	57	4.16e-12	58.9
XP_021832776.1	124	AT1G17147.1	AT1G17147.1 | Symbols: | VQ motif-containing protein | chr1:5863654-5863950 REVERSE LENGTH=98	125	36	98	2.36e-12	58.5
PNY08809.1	183	AT5G37200.1	AT5G37200.1 | Symbols: | RING/U-box superfamily protein | chr5:14727832-14728485 FORWARD LENGTH=217	52	42.308	28	3.54e-10	57
XP_002946989.1	323	AT1G69510.2	AT1G69510.2 | Symbols: | cAMP-regulated phosphoprotein 19-related protein | chr1:26126779-26127725 FORWARD LENGTH=137	88	45.455	26	1.05e-09	56.2
XP_006346821.1	109	AT4G37810.1	AT4G37810.1 | Symbols: | unknown protein; FUNCTIONS IN: molecular_function unknown; INVOLVED IN: biological_process unknown; LOCATED IN: endomembrane system; BEST Arabidopsis thaliana protein match is: unknown protein (TAIR:AT5G10310.1); Has 149 Blast hits to 149 proteins in 15 species: Archae - 0; Bacteria - 0; Metazoa - 0; Fungi - 0; Plants - 149; Viruses - 0; Other Eukaryotes - 0 (source: NCBI…	76	34.211	57	2.33e-08	48.5

## Sheet: string network
#node1	node2	node1_string_internal_id	node2_string_internal_id	node1_external_id	node2_external_id	combined_score
ARP2	ARPC1A	622009	617301	3702.AT3G27000.1	3702.AT2G30910.3	0.999
ARPC4	ARP2	625864	622009	3702.AT4G14147.2	3702.AT3G27000.1	0.999
ECR1	AXR1	630570	608280	3702.AT5G19180.1	3702.AT1G05180.1	0.999
ARPC4	DIS1	625864	609147	3702.AT4G14147.2	3702.AT1G13180.1	0.999
PWP2	AT1G06720	609393	608446	3702.AT1G15440.1	3702.AT1G06720.1	0.999
ARPC1A	DIS2	617301	610893	3702.AT2G30910.3	3702.AT1G30825.1	0.999
AT3G11964	EMB2762	620332	615871	3702.AT3G11964.1	3702.AT2G17250.1	0.999
PB	ATPA	635072	635050	3702.ATCG00480.1	3702.ATCG00120.1	0.999
AT3G10530	AT1G69070	620173	613703	3702.AT3G10530.1	3702.AT1G69070.1	0.999
AT4G04940	AT3G11964	625105	620332	3702.AT4G04940.1	3702.AT3G11964.1	0.999
ARP2	DIS1	622009	609147	3702.AT3G27000.1	3702.AT1G13180.1	0.999
AT4G04940	AT3G10530	625105	620173	3702.AT4G04940.1	3702.AT3G10530.1	0.999
AT3G11964	AT3G10530	620332	620173	3702.AT3G11964.1	3702.AT3G10530.1	0.999
AT1G69070	AT1G06720	613703	608446	3702.AT1G69070.1	3702.AT1G06720.1	0.999
AT3G10530	PWP2	620173	609393	3702.AT3G10530.1	3702.AT1G15440.1	0.999
ARPC1A	DIS1	617301	609147	3702.AT2G30910.3	3702.AT1G13180.1	0.999
AT4G04940	EMB2762	625105	615871	3702.AT4G04940.1	3702.AT2G17250.1	0.999
ARPC3	DIS2	612777	610893	3702.AT1G60430.2	3702.AT1G30825.1	0.999
AT3G10530	AT1G06720	620173	608446	3702.AT3G10530.1	3702.AT1G06720.1	0.999
AT1G69070	PWP2	613703	609393	3702.AT1G69070.1	3702.AT1G15440.1	0.999
AT5G14050	AT4G04940	630027	625105	3702.AT5G14050.1	3702.AT4G04940.1	0.999
AT4G04940	AT1G69070	625105	613703	3702.AT4G04940.1	3702.AT1G69070.1	0.999
AT5G14050	AT3G10530	630027	620173	3702.AT5G14050.1	3702.AT3G10530.1	0.999
EMB2762	PWP2	615871	609393	3702.AT2G17250.1	3702.AT1G15440.1	0.999
ATPE	ATPA	635071	635050	3702.ATCG00470.1	3702.ATCG00120.1	0.999
AT5G14050	AT1G06720	630027	608446	3702.AT5G14050.1	3702.AT1G06720.1	0.999
AT5G14050	AT3G11964	630027	620332	3702.AT5G14050.1	3702.AT3G11964.1	0.999
ARP2	DIS2	622009	610893	3702.AT3G27000.1	3702.AT1G30825.1	0.999
AT3G10530	EMB2762	620173	615871	3702.AT3G10530.1	3702.AT2G17250.1	0.999
ARPC1A	ARPC3	617301	612777	3702.AT2G30910.3	3702.AT1G60430.2	0.999
ARPC4	ARPC1B	625864	617352	3702.AT4G14147.2	3702.AT2G31300.1	0.999
ARPC1B	DIS1	617352	609147	3702.AT2G31300.1	3702.AT1G13180.1	0.999
AT5G14050	EMB2762	630027	615871	3702.AT5G14050.1	3702.AT2G17250.1	0.999
ARPC4	DIS2	625864	610893	3702.AT4G14147.2	3702.AT1G30825.1	0.999
AT3G11964	AT1G69070	620332	613703	3702.AT3G11964.1	3702.AT1G69070.1	0.999
ARPC1B	ARPC3	617352	612777	3702.AT2G31300.1	3702.AT1G60430.2	0.999
ARP2	ARPC1B	622009	617352	3702.AT3G27000.1	3702.AT2G31300.1	0.999
ARP2	ARPC3	622009	612777	3702.AT3G27000.1	3702.AT1G60430.2	0.999
ARPC4	ARPC3	625864	612777	3702.AT4G14147.2	3702.AT1G60430.2	0.999
AT3G11964	PWP2	620332	609393	3702.AT3G11964.1	3702.AT1G15440.1	0.999
AT4G04940	PWP2	625105	609393	3702.AT4G04940.1	3702.AT1G15440.1	0.999
AT5G14050	PWP2	630027	609393	3702.AT5G14050.1	3702.AT1G15440.1	0.999
DIS2	DIS1	610893	609147	3702.AT1G30825.1	3702.AT1G13180.1	0.999
AT4G04940	AT1G06720	625105	608446	3702.AT4G04940.1	3702.AT1G06720.1	0.999
EMB2762	AT1G69070	615871	613703	3702.AT2G17250.1	3702.AT1G69070.1	0.999
AT5G14050	AT1G69070	630027	613703	3702.AT5G14050.1	3702.AT1G69070.1	0.999
EMB2762	AT1G06720	615871	608446	3702.AT2G17250.1	3702.AT1G06720.1	0.999
ARPC4	ARPC1A	625864	617301	3702.AT4G14147.2	3702.AT2G30910.3	0.999
AT3G11964	AT1G06720	620332	608446	3702.AT3G11964.1	3702.AT1G06720.1	0.999
ARPC3	DIS1	612777	609147	3702.AT1G60430.2	3702.AT1G13180.1	0.999
PB	ATPE	635072	635071	3702.ATCG00480.1	3702.ATCG00470.1	0.999
EXO70A1	SEC6	628997	613976	3702.AT5G03540.3	3702.AT1G71820.2	0.998
ARPC1B	DIS2	617352	610893	3702.AT2G31300.1	3702.AT1G30825.1	0.998
ATPE	AT5G08680	635071	629543	3702.ATCG00470.1	3702.AT5G08680.1	0.996
ATPA	AT5G08680	635050	629543	3702.ATCG00120.1	3702.AT5G08680.1	0.993
SEC6	KEU	613976	609061	3702.AT1G71820.2	3702.AT1G12360.1	0.99
RBCL	PB	635073	635072	3702.ATCG00490.1	3702.ATCG00480.1	0.99
RBCL	MATK	635073	635045	3702.ATCG00490.1	3702.ATCG00040.1	0.986
RBCL	ATPA	635073	635050	3702.ATCG00490.1	3702.ATCG00120.1	0.975
rps14	UBQ1	635063	623445	3702.ATCG00330.1	3702.AT3G52590.1	0.944
PB	MATK	635072	635045	3702.ATCG00480.1	3702.ATCG00040.1	0.941
AT2G18330	PWP2	615989	609393	3702.AT2G18330.1	3702.AT1G15440.1	0.937
ATPA	MATK	635050	635045	3702.ATCG00120.1	3702.ATCG00040.1	0.936
rps14	ATPA	635063	635050	3702.ATCG00330.1	3702.ATCG00120.1	0.93
AT5G51440	HSP70	633297	620395	3702.AT5G51440.1	3702.AT3G12580.1	0.928
RBCL	RCA	635073	618258	3702.ATCG00490.1	3702.AT2G39730.1	0.926
HSP70	Hsp70b	620395	609455	3702.AT3G12580.1	3702.AT1G16030.1	0.916
ARP2	Hsp70b	622009	609455	3702.AT3G27000.1	3702.AT1G16030.1	0.905
FMN/FHY	AT1G06720	626700	608446	3702.AT4G21470.1	3702.AT1G06720.1	0.905
ARP2	HSP70	622009	620395	3702.AT3G27000.1	3702.AT3G12580.1	0.905
ARPC1B	ARPC1A	617352	617301	3702.AT2G31300.1	3702.AT2G30910.3	0.9
HSP23.6	AT1G53540	627110	612235	3702.AT4G25200.1	3702.AT1G53540.1	0.885
RBCL	rps14	635073	635063	3702.ATCG00490.1	3702.ATCG00330.1	0.866
AT1G53540	Hsp70b	612235	609455	3702.AT1G53540.1	3702.AT1G16030.1	0.853
ATPE	MATK	635071	635045	3702.ATCG00470.1	3702.ATCG00040.1	0.85
RBCL	ATPE	635073	635071	3702.ATCG00490.1	3702.ATCG00470.1	0.846
HSP23.6	Hsp70b	627110	609455	3702.AT4G25200.1	3702.AT1G16030.1	0.844
AT5G23430	AT5G14050	630947	630027	3702.AT5G23430.1	3702.AT5G14050.1	0.839
UBQ1	RCA	623445	618258	3702.AT3G52590.1	3702.AT2G39730.1	0.829
rps14	MATK	635063	635045	3702.ATCG00330.1	3702.ATCG00040.1	0.822
PB	rps14	635072	635063	3702.ATCG00480.1	3702.ATCG00330.1	0.812
ECR1	RCA	630570	618258	3702.AT5G19180.1	3702.AT2G39730.1	0.782
ATPE	rps14	635071	635063	3702.ATCG00470.1	3702.ATCG00330.1	0.772
AT3G10530	AT2G18330	620173	615989	3702.AT3G10530.1	3702.AT2G18330.1	0.769
rps14	AT3G11964	635063	620332	3702.ATCG00330.1	3702.AT3G11964.1	0.759
AT5G23430	PWP2	630947	609393	3702.AT5G23430.1	3702.AT1G15440.1	0.757
FMN/FHY	Hsp70b	626700	609455	3702.AT4G21470.1	3702.AT1G16030.1	0.742
AT5G39670	EDA39	632000	627972	3702.AT5G39670.1	3702.AT4G33050.2	0.738
HSP70	RCA	620395	618258	3702.AT3G12580.1	3702.AT2G39730.1	0.674
HSP70	MORF3	620395	619822	3702.AT3G12580.1	3702.AT3G06790.1	0.674
HSP23.6	HSP70	627110	620395	3702.AT4G25200.1	3702.AT3G12580.1	0.646
AT5G23430	AT4G04940	630947	625105	3702.AT5G23430.1	3702.AT4G04940.1	0.643
AT4G04940	AT2G18330	625105	615989	3702.AT4G04940.1	3702.AT2G18330.1	0.633
EDA39	PLA2A	627972	616851	3702.AT4G33050.2	3702.AT2G26560.1	0.631
HSP70	AT1G53540	620395	612235	3702.AT3G12580.1	3702.AT1G53540.1	0.622
CPK28	AT4G35500	634888	628236	3702.AT5G66210.1	3702.AT4G35500.2	0.619
AT5G51440	HSP23.6	633297	627110	3702.AT5G51440.1	3702.AT4G25200.1	0.602
AT5G08680	VAB2	629543	628558	3702.AT5G08680.1	3702.AT4G38510.5	0.589
PB	RCA	635072	618258	3702.ATCG00480.1	3702.AT2G39730.1	0.573
AT5G51440	Hsp70b	633297	609455	3702.AT5G51440.1	3702.AT1G16030.1	0.573
AT4G00290	MSL6	624635	614675	3702.AT4G00290.1	3702.AT1G78610.1	0.57
VAB2	Hsp70b	628558	609455	3702.AT4G38510.5	3702.AT1G16030.1	0.57
RBCL	HSP70	635073	620395	3702.ATCG00490.1	3702.AT3G12580.1	0.569
VAB2	FMN/FHY	628558	626700	3702.AT4G38510.5	3702.AT4G21470.1	0.565
AT5G39670	AT4G00290	632000	624635	3702.AT5G39670.1	3702.AT4G00290.1	0.564
CPK28	AT5G39670	634888	632000	3702.AT5G66210.1	3702.AT5G39670.1	0.561
AT5G51440	AT1G53540	633297	612235	3702.AT5G51440.1	3702.AT1G53540.1	0.553
PB	AT5G08680	635072	629543	3702.ATCG00480.1	3702.AT5G08680.1	0.546
RABB1C	SK41	626237	608785	3702.AT4G17170.1	3702.AT1G09840.3	0.544
ATPA	HSP70	635050	620395	3702.ATCG00120.1	3702.AT3G12580.1	0.542
PB	VAB2	635072	628558	3702.ATCG00480.1	3702.AT4G38510.5	0.54
ATPA	VAB2	635050	628558	3702.ATCG00120.1	3702.AT4G38510.5	0.536
RBCL	GUN1	635073	617364	3702.ATCG00490.1	3702.AT2G31400.1	0.522
FMN/FHY	HSP70	626700	620395	3702.AT4G21470.1	3702.AT3G12580.1	0.519
rps14	FMN/FHY	635063	626700	3702.ATCG00330.1	3702.AT4G21470.1	0.518
AT5G39670	PLA2A	632000	616851	3702.AT5G39670.1	3702.AT2G26560.1	0.507
RBCL	AT5G08680	635073	629543	3702.ATCG00490.1	3702.AT5G08680.1	0.504
AT3G11964	DIS1	620332	609147	3702.AT3G11964.1	3702.AT1G13180.1	0.497
STR18	AT2G43760	634884	618701	3702.AT5G66170.2	3702.AT2G43760.1	0.496
EDA39	CIPK13	627972	617662	3702.AT4G33050.2	3702.AT2G34180.1	0.474
AT5G14050	AT2G18330	630027	615989	3702.AT5G14050.1	3702.AT2G18330.1	0.47
ECR1	AT2G43760	630570	618701	3702.AT5G19180.1	3702.AT2G43760.1	0.461
AT2G43760	AXR1	618701	608280	3702.AT2G43760.1	3702.AT1G05180.1	0.461
AT3G11964	AT2G18330	620332	615989	3702.AT3G11964.1	3702.AT2G18330.1	0.444
AT2G18330	AT1G69070	615989	613703	3702.AT2G18330.1	3702.AT1G69070.1	0.443
AT5G09280	ARPC1B	629563	617352	3702.AT5G09280.1	3702.AT2G31300.1	0.43
AT5G09280	ARPC1A	629563	617301	3702.AT5G09280.1	3702.AT2G30910.3	0.43
MATK	AT5G08680	635045	629543	3702.ATCG00040.1	3702.AT5G08680.1	0.418
ATPA	RCA	635050	618258	3702.ATCG00120.1	3702.AT2G39730.1	0.417
MATK	RCA	635045	618258	3702.ATCG00040.1	3702.AT2G39730.1	0.403

## Sheet: Annotation
#node	identifier	domain_summary_url	annotation	other_names_and_aliases
AT1G01840	3702.AT1G01840.1	http://smart.embl.de/smart/DDt.cgi?smart=152:	AP2-like ethylene-responsive transcription factor SNZ; Unknown protein; Has 23 Blast hits to 23 proteins in 9 species: Archae - 0; Bacteria - 0; Metazoa - 0; Fungi - 0; Plants - 23; Viruses - 0; Other Eukaryotes - 0 (source: NCBI BLink)	839291	839291
SOM	3702.AT1G03790.1	https://smart.embl.de/smart/DDvec.cgi?smart=393:ZnF_C3H1(122|149)+ZnF_C3H1(158|181)+	Zinc finger C-x8-C-x5-C-x3-H type family protein; Probable transcription repressor that functions as negative regulator of phytochrome-mediated promotion of seed germination. Inhibits seed germination by regulating the expression of gibberellic acid (GA) and abscisic acid (ABA) metabolic genes. Does not regulate the expression of the DELLA genes RGA and RGA1. Activated by PIL5, a phytochrome-inte…	839408	839408
ABCI18	3702.AT1G03900.1	https://smart.embl.de/smart/DDvec.cgi?smart=272:Pfam_DUF1681(12|175)+	Uncharacterized protein At1g03900; Member of NAP family, an heterogeneous subfamily of the ATP-binding Cassette (ABC) superfamily of membrane transporters. The NAPs proteins are characterized by having only one nucleotide-binding folds (NBFs) domain	839378	839378
AT1G04790	3702.AT1G04790.1	https://smart.embl.de/smart/DDvec.cgi?smart=634:RING(589|629)+	Uncharacterized protein At1g04790; RING/U-box superfamily protein; Its function is described as zinc ion binding; Expressed in 24 plant structures; Expressed during 15 growth stages; Contains the following InterPro domains: Zinc finger, RING-type (InterPro:IPR001841), Zinc finger, C3HC4 RING-type (InterPro:IPR018957); BEST Arabidopsis thaliana protein match is: RING/U-box superfamily protein (TAI…	839412	839412
AXR1	3702.AT1G05180.1	https://smart.embl.de/smart/DDvec.cgi?smart=540:Pfam_ThiF(24|538)+	NEDD8-activating enzyme E1 regulatory subunit AXR1; Regulatory subunit of the dimeric ECR1-AXR1 E1 enzyme. E1 activates RUB1/NEDD8 by first adenylating its C-terminal glycine residue with ATP, thereafter linking this residue to the side chain of the catalytic cysteine, yielding a RUB1-ECR1 thioester and free AMP. E1 finally transfers RUB1 to the catalytic cysteine of RCE1. Plays an important role…	839286	A5YXM9_ARATH
AT1G06720	3702.AT1G06720.1	https://smart.embl.de/smart/DDvec.cgi?smart=1147:AARP2CN(232|318)+DUF663(663|980)+COIL(1093|1146)+	P-loop containing nucleoside triphosphate hydrolases superfamily protein; Its function is described as GTP binding, GTPase activity; Involved in ribosome biogenesis; Located in nucleus; Expressed in 21 plant structures; Expressed during 13 growth stages; Contains the following InterPro domains: AARP2CN (InterPro:IPR012948), Protein synthesis factor, GTP-binding (InterPro:IPR000795), Protein of un…	837182	837182
NDA1	3702.AT1G07180.1	https://smart.embl.de/smart/DDvec.cgi?smart=510:Pfam_Pyr_redox(243|324)+	Internal alternative NAD(P)H-ubiquinone oxidoreductase A1, mitochondrial; Internal NAD(P)H dehydrogenase in mitochondria. The predicted protein sequence has high homology with other designated NAD(P)H DHs from microorganisms; the capacity for matrix NAD(P)H oxidation via the rotenone-insensitive pathway is significantly reduced in the Atndi1 mutant plant line; the in vitro translation product of …	1.6.5.9	837229
SK41	3702.AT1G09840.3	https://smart.embl.de/smart/DDvec.cgi?smart=421:S_TKc(83|367)+	Shaggy-related protein kinase kappa; May mediate extracellular signals to regulate transcription in differentiating cells; Belongs to the protein kinase superfamily. CMGC Ser/Thr protein kinase family. GSK-3 subfamily	2.7.11.26	837516
AT1G12300	3702.AT1G12300.1	https://smart.embl.de/smart/DDvec.cgi?smart=637:Pfam_PPR_3(109|169)+Pfam_PPR_3(179|241)+Pfam_PPR_2(232|275)+Pfam_PPR_3(284|346)+Pfam_PPR_long(345|446)+Pfam_PPR(439|469)+Pfam_PPR_1(467|500)+Pfam_PPR_3(494|556)+Pfam_PPR(579|609)+	Pentatricopeptide repeat-containing protein At1g12300, mitochondrial; Tetratricopeptide repeat (TPR)-like superfamily protein; Involved in biological_process unknown; Located in mitochondrion; Contains the following InterPro domains: Pentatricopeptide repeat (InterPro:IPR002885); BEST Arabidopsis thaliana protein match is: Pentatricopeptide repeat (PPR) superfamily protein (TAIR:AT1G12775.1); Has…	837784	837784
KEU	3702.AT1G12360.1	https://smart.embl.de/smart/DDvec.cgi?smart=666:Pfam_Sec1(44|649)+	Sec1/munc18-like (SM) proteins superfamily; Encodes a Sec1 protein and expressed throughout the plant. physically interacts with Syntaxin1 and is required for cytokinesis	837791	837791
DIS1	3702.AT1G13180.1	https://smart.embl.de/smart/DDvec.cgi?smart=427:ACTIN(6|422)+	Actin-like ATPase superfamily protein; Functions as ATP-binding component of the Arp2/3 complex which is involved in regulation of actin polymerization and together with an activating nucleation-promoting factor (NPF) mediates the formation of branched actin networks. Seems to contact the pointed end of the daughter actin filament (By similarity). Arp2/3 complex plays a critical role in the contr…	837876	837876
PWP2	3702.AT1G15440.1	https://smart.embl.de/smart/DDvec.cgi?smart=900:WD40(40|80)+WD40(83|120)+WD40(130|169)+WD40(335|375)+WD40(378|417)+WD40(420|459)+WD40(462|503)+WD40(506|545)+WD40(549|587)+WD40(610|649)+Pfam_Utp12(790|895)+	Periodic tryptophan protein 2; Involved in nucleolar processing of pre-18S ribosomal RNA. Plays a role early in ribosome biogenesis, especially in the maturation of 5.8S rRNA. Required for guard cell functions	(PERIODIC TRYPTOPHAN PROTEIN 2	838115
Hsp70b	3702.AT1G16030.1	https://smart.embl.de/smart/DDvec.cgi?smart=646:Pfam_MreB_Mbl(120|386)+	Heat shock 70 kDa protein 5; In cooperation with other chaperones, Hsp70s stabilize preexistent proteins against aggregation and mediate the folding of newly translated polypeptides in the cytosol as well as within organelles. These chaperones participate in all these processes through their ability to recognize nonnative conformations of other proteins. They bind extended peptide segments with a…	838174	838174
AT1G17147	3702.AT1G17147.1	https://smart.embl.de/smart/DDvec.cgi?smart=98:Pfam_VQ(14|41)+	VQ motif-containing protein 1; May modulate WRKY transcription factor activities	6240987	A0MDM3
AT1G17450	3702.AT1G17450.2	https://smart.embl.de/smart/DDvec.cgi?smart=1844:Pfam_B-block_TFIIIC(105|189)+HOX(907|977)+	B-block binding subunit of TFIIIC; Its function is described as molecular_function unknown; Contains the following InterPro domains: B-block binding subunit of TFIIIC (InterPro:IPR007309); BEST Arabidopsis thaliana protein match is: B-block binding subunit of TFIIIC (TAIR:AT1G59453.1)	838317	838317
SDG35	3702.AT1G26760.1	https://smart.embl.de/smart/DDvec.cgi?smart=545:SET(188|382)+	SET domain protein 35 (SDG35); Its function is described as binding; Involved in biological_process unknown; Expressed in 21 plant structures; Expressed during 12 growth stages; Contains the following InterPro domains: SET domain (InterPro:IPR001214), Tetratricopeptide-like helical (InterPro:IPR011990), Tetratricopeptide repeat-containing (InterPro:IPR013026), Tetratricopeptide repeat (InterPro:I…	839217	839217
GA2OX2	3702.AT1G30040.1	https://smart.embl.de/smart/DDvec.cgi?smart=341:Pfam_DIOX_N(31|139)+Pfam_2OG-FeII_Oxy(180|283)+	Gibberellin 2-beta-dioxygenase 2; Catalyzes the 2-beta-hydroxylation of several biologically active gibberellins, leading to the homeostatic regulation of their endogenous level. Catabolism of gibberellins (GAs) plays a central role in plant development. Converts GA9/GA20 to GA51/GA29 and GA4/GA1 to GA34/GA8	1.14.11.13	839883
DIS2	3702.AT1G30825.1	https://smart.embl.de/smart/DDvec.cgi?smart=318:Pfam_P34-Arc(68|294)+	Actin-related protein 2/3 complex subunit 2A; Functions as actin-binding component of the Arp2/3 complex which is involved in regulation of actin polymerization and together with an activating nucleation-promoting factor (NPF) mediates the formation of branched actin networks. Seems to contact the mother actin filament (By similarity). Arp2/3 complex plays a critical role in the control of cell m…	839965	839965
AT1G31730	3702.AT1G31730.1	https://smart.embl.de/smart/DDvec.cgi?smart=938:Pfam_Cnd1(137|317)+	AP-4 complex subunit epsilon; Subunit of novel type of clathrin- or non-clathrin- associated protein coat involved in targeting proteins from the trans-Golgi network (TGN) to the endosomal-lysosomal system	840060	840060
AT1G53540	3702.AT1G53540.1	https://smart.embl.de/smart/DDvec.cgi?smart=157:Pfam_HSP20(53|156)+	HSP20-like chaperones superfamily protein; Contains the following InterPro domains: Heat shock protein Hsp20 (InterPro:IPR002068), HSP20-like chaperone (InterPro:IPR008978); BEST Arabidopsis thaliana protein match is: heat shock protein 17.4 (TAIR:AT3G46230.1); Has 7090 Blast hits to 7089 proteins in 1610 species: Archae - 175; Bacteria - 4287; Metazoa - 66; Fungi - 302; Plants - 1606; Viruses - …	17.6 kDa class I heat shock protein 3	17.6 kDa class I heat shock protein 3
AT1G59960	3702.AT1G59960.1	https://smart.embl.de/smart/DDvec.cgi?smart=326:Pfam_Aldo_ket_red(23|296)+	NAD(P)-linked oxidoreductase superfamily protein; Its function is described as oxidoreductase activity; Involved in response to salt stress; Expressed in 21 plant structures; Expressed during 13 growth stages; Contains the following InterPro domains: Aldo/keto reductase (InterPro:IPR001395), Aldo/keto reductase subgroup (InterPro:IPR020471), Aldo/keto reductase, conserved site (InterPro:IPR018170…	1.1.1.285	842290
ARPC3	3702.AT1G60430.2	https://smart.embl.de/smart/DDvec.cgi?smart=174:Pfam_P21-Arc(1|173)+	Actin-related protein 2/3 complex subunit 3; Functions as component of the Arp2/3 complex which is involved in regulation of actin polymerization and together with an activating nucleation-promoting factor (NPF) mediates the formation of branched actin networks. Arp2/3 complex plays a critical role in the control of cell morphogenesis via the modulation of cell polarity development	842338	842338
ATB2	3702.AT1G60710.1	https://smart.embl.de/smart/DDvec.cgi?smart=345:Pfam_Aldo_ket_red(23|315)+	NAD(P)-linked oxidoreductase superfamily protein; Encodes ATB2	842365	842365
AT1G69070	3702.AT1G69070.1	https://smart.embl.de/smart/DDvec.cgi?smart=901:Pfam_Nop14(27|885)+	Nucleolar-like protein; Its function is described as molecular_function unknown; Involved in biological_process unknown; Located in cellular_component unknown; Expressed in 23 plant structures; Expressed during 13 growth stages; Contains the following InterPro domains: Nop14-like protein (InterPro:IPR007276); Has 69842 Blast hits to 35213 proteins in 1572 species: Archae - 363; Bacteria - 20593; …	843239	843239
AT1G69510	3702.AT1G69510.2	https://smart.embl.de/smart/DDvec.cgi?smart=137:Pfam_Endosulfine(19|95)+	cAMP-regulated phosphoprotein 19-related protein; Contains the following InterPro domains: cAMP-regulated phosphoprotein/endosulphine conserved region (InterPro:IPR006760); BEST Arabidopsis thaliana protein match is: cAMP-regulated phosphoprotein 19-related protein (TAIR:AT5G64130.1); Has 157 Blast hits to 157 proteins in 21 species: Archae - 0; Bacteria - 0; Metazoa - 0; Fungi - 0; Plants - 157;…	843284	843284
SEC6	3702.AT1G71820.2	https://smart.embl.de/smart/DDvec.cgi?smart=774:Pfam_Sec6(490|759)+	Exocyst complex component SEC6; Component of the exocyst complex involved in the docking of exocytic vesicles with fusion sites on the plasma membrane during regulated or polarized secretion. Involved in polarized cell growth and organ morphogenesis. During cytokinesis, involved in cell plate initiation, cell plate maturation and formation of new primary cell wall; Belongs to the SEC6 family	843512	AAF43235.1
AT1G73530	3702.AT1G73530.1	https://smart.embl.de/smart/DDvec.cgi?smart=181:RRM(78|151)+	Organelle RRM domain-containing protein 6, chloroplastic; Involved in C-to-U editing of chloroplastic RNA. Required for the photosynthetic subunit psbF transcript editing in chloroplast	843687	AAG30979.1
AT1G76740	3702.AT1G76740.1	http://smart.embl.de/smart/DDt.cgi?smart=1532:	Uncharacterized protein F28O16.11; Unknown protein; BEST Arabidopsis thaliana protein match is: unknown protein (TAIR:AT1G76840.1); Has 3683 Blast hits to 2942 proteins in 407 species: Archae - 9; Bacteria - 440; Metazoa - 1472; Fungi - 269; Plants - 192; Viruses - 8; Other Eukaryotes - 1293 (source: NCBI BLink)	844008	844008
MSL6	3702.AT1G78610.1	https://smart.embl.de/smart/DDvec.cgi?smart=856:TRANS(243|265)+TRANS(280|302)+TRANS(323|341)+TRANS(356|378)+Pfam_MS_channel(613|820)+	Mechanosensitive channel of small conductance-like 6; Mechanosensitive channel that opens in response to stretch forces in the membrane lipid bilayer	844197	844197
EMB2762	3702.AT2G17250.1	https://smart.embl.de/smart/DDvec.cgi?smart=577:Pfam_CBF(334|504)+	CCAAT-binding factor; EMBRYO DEFECTIVE 2762 (EMB2762); Its function is described as molecular_function unknown; Involved in biological_process unknown; Located in membrane; Expressed in 22 plant structures; Expressed during 13 growth stages; Contains the following InterPro domains: CCAAT-binding factor (InterPro:IPR005612); Has 30201 Blast hits to 17322 proteins in 780 species: Archae - 12; Bacte…	816230	816230
COAD	3702.AT2G18250.1	https://smart.embl.de/smart/DDvec.cgi?smart=176:Pfam_CTP_transf_like(19|159)+	4-phosphopantetheine adenylyltransferase; Reversibly transfers an adenylyl group from ATP to 4'- phosphopantetheine, yielding dephospho-CoA (dPCoA) and pyrophosphate. Does not accept 4'-phosphopantothenoylcysteine as a substrate	2.7.7.3	2.7.7.3
AT2G18330	3702.AT2G18330.1	https://smart.embl.de/smart/DDvec.cgi?smart=636:Pfam_DUF3523(49|319)+AAA(384|517)+	AAA-type ATPase family protein; Its function is described as nucleoside-triphosphatase activity, ATPase activity, nucleotide binding, ATP binding; Expressed in 23 plant structures; Expressed during 13 growth stages; Contains the following InterPro domains: ATPase, AAA-type, core (InterPro:IPR003959), ATPase, AAA+ type, core (InterPro:IPR003593), ATPase, AAA-type, conserved site (InterPro:IPR00396…	816348	816348
ATCTH	3702.AT2G25900.1	https://smart.embl.de/smart/DDvec.cgi?smart=315:ZnF_C3H1(130|156)+ZnF_C3H1(165|188)+	Putative Cys3His zinc finger protein (ATCTH) mRNA, complete	817131	817131
PLA2A	3702.AT2G26560.1	https://smart.embl.de/smart/DDvec.cgi?smart=407:Pfam_Patatin(22|228)+	Patatin-like protein 2; Possesses non-specific lipolytic acyl hydrolase (LAH) activity. Catalyzes the hydrolysis of the galactolipids monogalactosyldiacylglycerol (MGDG) and digalactosyldiacylglycerol (DGDG), and less efficiently the phoshpolipids phosphatidylcholine (PC), phosphatidylethanolamine (PE), phosphatidylglycerol (PG), phosphatidic acid (PA), phosphatidylserine (PS) and phosphatidylino…	817197	AAC14504.1
BAS1	3702.AT2G26710.1	https://smart.embl.de/smart/DDvec.cgi?smart=520:TRANS(13|35)+Pfam_p450(70|512)+	Encodes a member of the cytochrome p450 family that serves as a control point between multiple photoreceptor systems and brassinosteroid signal transduction. Involved in brassinolide metabolism. Mediates response to a variety of light signals including hypocotyl elongation and cotyledon expansion	1.14.-.-	817212
AT2G27140	3702.AT2G27140.1	https://smart.embl.de/smart/DDvec.cgi?smart=224:Pfam_HSP20(22|112)+TRANS(197|219)+	HSP20-like chaperones superfamily protein; Its function is described as molecular_function unknown; Involved in response to heat; Located in membrane; Expressed in 19 plant structures; Expressed during 12 growth stages; Contains the following InterPro domains: Heat shock protein Hsp20 (InterPro:IPR002068), HSP20-like chaperone (InterPro:IPR008978); BEST Arabidopsis thaliana protein match is: HSP2…	817256	817256
AT2G30230	3702.AT2G30230.1	https://smart.embl.de/smart/DDvec.cgi?smart=177:Pfam_DUF4228(1|174)+	6,7-dimethyl-8-ribityllumazine synthase; Unknown protein; Its function is described as molecular_function unknown; Involved in biological_process unknown; Located in endomembrane system; BEST Arabidopsis thaliana protein match is: unknown protein (TAIR:AT1G06980.1); Has 167 Blast hits to 167 proteins in 14 species: Archae - 0; Bacteria - 0; Metazoa - 0; Fungi - 0; Plants - 167; Viruses - 0; Other…	6,7-dimethyl-8-ribityllumazine synthase	6,7-dimethyl-8-ribityllumazine synthase
DRIP2	3702.AT2G30580.1	https://smart.embl.de/smart/DDvec.cgi?smart=420:RING(20|60)+	E3 ubiquitin protein ligase DRIP2; E3 ubiquitin-protein ligase that acts as a negative regulator of the response to water stress. Mediates ubiquitination and subsequent proteasomal degradation of the drought-induced transcriptional activator DREB2A. Functionally redundant with DRIP1	2.3.2.27	817608
ARPC1A	3702.AT2G30910.3	https://smart.embl.de/smart/DDvec.cgi?smart=378:WD40(44|83)+WD40(88|127)+WD40(133|173)+WD40(194|233)+WD40(322|366)+	Actin-related protein 2/3 complex subunit 1A; Functions as component of the Arp2/3 complex which is involved in regulation of actin polymerization and together with an activating nucleation-promoting factor (NPF) mediates the formation of branched actin networks. Arp2/3 complex plays a critical role in the control of cell morphogenesis via the modulation of cell polarity development	817641	817641
ARPC1B	3702.AT2G31300.1	https://smart.embl.de/smart/DDvec.cgi?smart=378:WD40(44|83)+WD40(88|127)+WD40(133|173)+WD40(194|233)+WD40(322|366)+	Actin-related protein 2/3 complex subunit 1B; Functions as component of the Arp2/3 complex which is involved in regulation of actin polymerization and together with an activating nucleation-promoting factor (NPF) mediates the formation of branched actin networks. Arp2/3 complex plays a critical role in the control of cell morphogenesis via the modulation of cell polarity development; Belongs to t…	817687	817687
GUN1	3702.AT2G31400.1	https://smart.embl.de/smart/DDvec.cgi?smart=918:Pfam_PPR_3(254|316)+Pfam_PPR_3(319|352)+Pfam_PPR_3(360|422)+Pfam_PPR_3(430|491)+Pfam_PPR_1(508|541)+Pfam_PPR_3(535|597)+Pfam_PPR_3(653|687)+SMR(781|873)+	Pentatricopeptide repeat-containing protein At2g31400, chloroplastic; Encodes a a chloroplast-localized pentatricopeptide-repeat protein involved in regulation of nuclear gene expression	817698	817698
CIPK13	3702.AT2G34180.1	https://smart.embl.de/smart/DDvec.cgi?smart=502:S_TKc(57|311)+Pfam_NAF(368|421)+	CBL-interacting serine/threonine-protein kinase 13; CIPK serine-threonine protein kinases interact with CBL proteins. Binding of a CBL protein to the regulatory NAF domain of CIPK protein lead to the activation of the kinase in a calcium- dependent manner (By similarity); Belongs to the protein kinase superfamily. CAMK Ser/Thr protein kinase family. SNF1 subfamily	817979	817979
AT2G39490	3702.AT2G39490.1	https://smart.embl.de/smart/DDvec.cgi?smart=387:FBOX(12|51)+	F-box family protein; Its function is described as molecular_function unknown; Involved in biological_process unknown; Located in endomembrane system; Contains the following InterPro domains: F-box domain, cyclin-like (InterPro:IPR001810), F-box domain, Skp2-like (InterPro:IPR022364); Has 107 Blast hits to 102 proteins in 10 species: Archae - 0; Bacteria - 0; Metazoa - 0; Fungi - 0; Plants - 107;…	818534	818534
RCA	3702.AT2G39730.1	https://smart.embl.de/smart/DDvec.cgi?smart=474:Pfam_AAA(161|308)+	Ribulose bisphosphate carboxylase/oxygenase activase, chloroplastic; Activation of RuBisCO (ribulose-1,5-bisphosphate carboxylase/oxygenase; EC 4.1.1.39) involves the ATP-dependent carboxylation of the epsilon-amino group of lysine leading to a carbamate structure	4W5W	4W5W
AT2G43760	3702.AT2G43760.1	https://smart.embl.de/smart/DDvec.cgi?smart=198:Pfam_MoaE(14|125)+	Molybdopterin biosynthesis MoaE family protein; Catalytic subunit of the molybdopterin synthase complex, a complex that catalyzes the conversion of precursor Z into molybdopterin. Acts by mediating the incorporation of 2 sulfur atoms from thiocarboxylated MOCS2A into precursor Z to generate a dithiolene group	2.8.1.12	818979
AT3G01190	3702.AT3G01190.1	https://smart.embl.de/smart/DDvec.cgi?smart=321:SIGNAL(1|23)+Pfam_peroxidase(42|284)+	Peroxidase superfamily protein; Removal of H(2)O(2), oxidation of toxic reductants, biosynthesis and degradation of lignin, suberization, auxin catabolism, response to environmental stresses such as wounding, pathogen attack and oxidative stress. These functions might be dependent on each isozyme/isoform in each plant tissue; Belongs to the peroxidase family. Classical plant (class III) peroxidas…	1.11.1.7	821314
ATN	3702.AT3G05330.1	http://smart.embl.de/smart/DDt.cgi?smart=444:	Encodes a protein with moderate sequence similarity to the maize microtubule-binding protein TANGLED1. A single base-pair deletion (-A) at position Chr3:1519176 in Columbia relative to the Landsberg erecta and Achkarren-2 ecotype (see ESTs DR378436 and CB26450) introduces a frame-shift and premature termination codon. The protein encoded from the Columbia gene is truncated by 29 amino acids relat…	819697	819697
MORF3	3702.AT3G06790.1	http://smart.embl.de/smart/DDt.cgi?smart=244:	Multiple organellar RNA editing factor 3, mitochondrial; Involved in organellar RNA editing. Required for the processing of RNA editing sites in mitochondria	819864	AAF63819.1
AT3G10530	3702.AT3G10530.1	https://smart.embl.de/smart/DDvec.cgi?smart=536:WD40(106|145)+WD40(148|185)+WD40(187|225)+WD40(270|309)+BING4CT(359|439)+	Transducin/WD40 repeat-like superfamily protein; Its function is described as nucleotide binding; Involved in biological_process unknown; Located in CUL4 RING ubiquitin ligase complex; Expressed in 23 plant structures; Expressed during 13 growth stages; Contains the following InterPro domains: WD40 repeat 2 (InterPro:IPR019782), BING4, C-terminal (InterPro:IPR012952), WD40 repeat-like-containing …	820218	820218
AT3G11964	3702.AT3G11964.1	https://smart.embl.de/smart/DDvec.cgi?smart=1896:S1(126|210)+S1(224|291)+S1(312|384)+S1(398|458)+S1(473|542)+S1(560|631)+S1(633|707)+S1(725|796)+S1(838|904)+S1(932|1005)+S1(1026|1105)+S1(1127|1200)+S1(1234|1310)+S1(1343|1414)+S1(1433|1505)+COIL(1595|1627)+HAT(1628|1659)+HAT(1661|1698)+HAT(1804|1836)+HAT(1838|1873)+	rRNA biogenesis protein RRP5; Involved in the biogenesis of ribosomal RNA (rRNA). Required for the formation of 5.8S rRNA. Required for normal development of female gametophytes	820370	AEE75131.1
HSP70	3702.AT3G12580.1	https://smart.embl.de/smart/DDvec.cgi?smart=650:Pfam_MreB_Mbl(119|387)+	Probable mediator of RNA polymerase II transcription subunit 37c; Component of the Mediator complex, a coactivator involved in the regulated transcription of nearly all RNA polymerase II-dependent genes. Mediator functions as a bridge to convey information from gene-specific regulatory proteins to the basal RNA polymerase II transcription machinery. The Mediator complex, having a compact conforma…	820438	820438
AT3G21990	3702.AT3G21990.1	https://smart.embl.de/smart/DDvec.cgi?smart=256:SIGNAL(1|26)+Pfam_Stress-antifung(37|134)+Pfam_Stress-antifung(148|251)+	Cysteine-rich repeat secretory protein 29; Domain of unknown function (DUF26); Its function is described as molecular_function unknown; Involved in biological_process unknown; Located in endomembrane system; Contains the following InterPro domains: Protein of unknown function DUF26 (InterPro:IPR002902); BEST Arabidopsis thaliana protein match is: Domain of unknown function (DUF26) (TAIR:AT4G20670…	821759	821759
ALDH2C4	3702.AT3G24503.1	https://smart.embl.de/smart/DDvec.cgi?smart=501:Pfam_Aldedh(28|491)+	Aldehyde dehydrogenase family 2 member C4; Involved in ferulic acid and sinapic acid biosynthesis by oxidation of conyferylaldehyde and sinapaldehyde, respectively. Can oxidize L-lactaldehyde. Possesses activity on acetaldehyde and glycolaldehyde in vitro; Belongs to the aldehyde dehydrogenase family	1.2.1.68	822042
ARP2	3702.AT3G27000.1	https://smart.embl.de/smart/DDvec.cgi?smart=389:ACTIN(4|388)+	Actin-related protein 2; Functions as ATP-binding component of the Arp2/3 complex which is involved in regulation of actin polymerization and together with an activating nucleation-promoting factor (NPF) mediates the formation of branched actin networks. Seems to contact the pointed end of the daughter actin filament (By similarity). Arp2/3 complex plays a critical role in the control of cell mor…	822317	822317
AT3G29785	3702.AT3G29785.1	http://smart.embl.de/smart/DDt.cgi?smart=109:	Pol-like polyprotein/retrotransposon; Unknown protein; Has 90 Blast hits to 90 proteins in 7 species: Archae - 0; Bacteria - 0; Metazoa - 0; Fungi - 0; Plants - 90; Viruses - 0; Other Eukaryotes - 0 (source: NCBI BLink)	822671	822671
AT3G47680	3702.AT3G47680.1	https://smart.embl.de/smart/DDvec.cgi?smart=302:Pfam_NAM-associated(153|291)+	Uncharacterized protein T23J7.10; DNA binding; BEST Arabidopsis thaliana protein match is: glutathione S-transferase THETA 3 (TAIR:AT5G41220.1); Has 545 Blast hits to 544 proteins in 20 species: Archae - 0; Bacteria - 1; Metazoa - 18; Fungi - 0; Plants - 496; Viruses - 0; Other Eukaryotes - 30 (source: NCBI BLink)	823922	823922
FER	3702.AT3G51550.1	https://smart.embl.de/smart/DDvec.cgi?smart=895:SIGNAL(1|27)+Pfam_Malectin(35|190)+Pfam_Malectin(225|379)+TRANS(447|469)+Pfam_Pkinase_Tyr(536|807)+	Malectin/receptor-like protein kinase family protein; Receptor-like protein kinase that mediates the female control of male gamete delivery during fertilization, including growth cessation of compatible pollen tubes ensuring a reproductive isolation barriers, by regulating MLO7 subcellular polarization upon pollen tube perception in the female gametophyte synergids. Required for cell elongation d…	824318	824318
UBQ1	3702.AT3G52590.1	https://smart.embl.de/smart/DDvec.cgi?smart=128:UBQ(1|72)+Ribosomal_L40e(77|128)+	Ubiquitin-60S ribosomal protein L40-1; Ubiquitin: exists either covalently attached to another protein, or free (unanchored). When covalently bound, it is conjugated to target proteins via an isopeptide bond either as a monomer (monoubiquitin), a polymer linked via different Lys residues of the ubiquitin (polyubiquitin chains) or a linear polymer linked via the initiator Met of the ubiquitin (lin…	818189	818189
AT4G00290	3702.AT4G00290.1	https://smart.embl.de/smart/DDvec.cgi?smart=497:TRANS(153|175)+TRANS(213|230)+TRANS(234|256)+Pfam_MS_channel(284|488)+	Mechanosensitive ion channel protein 1, mitochondrial; Mechanosensitive channel that opens in response to stretch forces in the membrane lipid bilayer	828077	828077
AT4G04480	3702.AT4G04480.1	https://smart.embl.de/smart/DDvec.cgi?smart=398:Pfam_Chloroplast_duf(72|377)+	Unknown protein; Located in chloroplast; Expressed in flower, pollen tube; Expressed during petal differentiation and expansion stage; BEST Arabidopsis thaliana protein match is: F-box family protein with a domain of unknown function (DUF295) (TAIR:AT4G22030.1); Has 78 Blast hits to 78 proteins in 10 species: Archae - 0; Bacteria - 0; Metazoa - 0; Fungi - 0; Plants - 78; Viruses - 0; Other Eukary…	825778	825778
AT4G04940	3702.AT4G04940.1	https://smart.embl.de/smart/DDvec.cgi?smart=910:WD40(170|209)+WD40(212|253)+WD40(256|296)+WD40(303|342)+WD40(464|502)+WD40(504|543)+WD40(546|585)+WD40(591|627)+Pfam_Utp21(665|906)+	Transducin family protein / WD-40 repeat family protein; Its function is described as nucleotide binding; Involved in rRNA processing; Located in CUL4 RING ubiquitin ligase complex; Expressed in 20 plant structures; Expressed during 11 growth stages; Contains the following InterPro domains: WD40 repeat 2 (InterPro:IPR019782), WD40 repeat, conserved site (InterPro:IPR019775), WD40 repeat (InterPro…	825833	825833
ARPC4	3702.AT4G14147.2	https://smart.embl.de/smart/DDvec.cgi?smart=176:Pfam_ARPC4(1|150)+	Actin-related protein 2/3 complex subunit 4; Functions as actin-binding component of the Arp2/3 complex which is involved in regulation of actin polymerization and together with an activating nucleation-promoting factor (NPF) mediates the formation of branched actin networks. Seems to contact the mother actin filament (By similarity). Arp2/3 complex plays a critical role in the control of cell mo…	3770404	3770404
AT4G16060	3702.AT4G16060.1	https://smart.embl.de/smart/DDvec.cgi?smart=289:SIGNAL(1|18)+	Unknown protein; Its function is described as molecular_function unknown; Involved in biological_process unknown; Located in chloroplast, chloroplast stroma; Expressed in 22 plant structures; Expressed during 13 growth stages; Has 42 Blast hits to 42 proteins in 16 species: Archae - 0; Bacteria - 2; Metazoa - 0; Fungi - 0; Plants - 33; Viruses - 0; Other Eukaryotes - 7 (source: NCBI BLink)	827291	827291
RABB1C	3702.AT4G17170.1	https://smart.embl.de/smart/DDvec.cgi?smart=211:RAB(7|170)+	Ras-related protein RABB1c; Intracellular vesicle trafficking and protein transport	827428	827428
FMN/FHY	3702.AT4G21470.1	https://smart.embl.de/smart/DDvec.cgi?smart=379:Pfam_HAD_2(14|193)+Flavokinase(234|364)+	Bifunctional riboflavin kinase/FMN phosphatase; Bifunctional enzyme that catalyzes the hydrolysis of flavin-mononucleotide (FMN) to riboflavin (vitamin B2) and the phosphorylation of riboflavin to form (FMN) coenzyme; In the C-terminal section; belongs to the flavokinase family	2.7.1.26	3.1.3.102
AT4G21745	3702.AT4G21745.1	https://smart.embl.de/smart/DDvec.cgi?smart=156:Pfam_PBD(25|94)+	PAK-box/P21-Rho-binding family protein; Functions as downstream effector of Rho-related GTP binding proteins of the "Rho of Plants" (ROPs) family. Participates in the propagation of ROP GTPase signals in specific cellular responses (By similarity)	5008153	5008153
HSP23.6	3702.AT4G25200.1	https://smart.embl.de/smart/DDvec.cgi?smart=210:Pfam_HSP20(110|210)+	Mitochondrion-localized small heat shock protein 23.6; AtHSP23.6-mito mRNA, nuclear gene encoding mitochondrial; Belongs to the small heat shock protein (HSP20) family	23.6 kDa heat shock protein, mitochondrial	23.6 kDa heat shock protein, mitochondrial
AT4G29090	3702.AT4G29090.1	https://smart.embl.de/smart/DDvec.cgi?smart=575:Pfam_zf-RVT(223|319)+Pfam_RVT_3(431|552)+	Putative reverse transcriptase/RNA-dependent DNA polymerase; Ribonuclease H-like superfamily protein; Its function is described as RNA binding, RNA-directed DNA polymerase activity, nucleic acid binding; Involved in RNA-dependent DNA replication; Located in endomembrane system; Contains the following InterPro domains: Polynucleotidyl transferase, ribonuclease H fold (InterPro:IPR012337), RNA-dire…	829030	829030
AT4G31860	3702.AT4G31860.1	https://smart.embl.de/smart/DDvec.cgi?smart=357:PP2C_SIG(28|329)+	Protein phosphatase 2C family protein; Its function is described as protein serine/threonine phosphatase activity, catalytic activity; Involved in protein amino acid dephosphorylation, N-terminal protein myristoylation; Located in plasma membrane; Expressed in 24 plant structures; Expressed during 15 growth stages; Contains the following InterPro domains: Protein phosphatase 2C, manganese/magnesi…	3.1.3.16	829315
EDA39	3702.AT4G33050.2	https://smart.embl.de/smart/DDvec.cgi?smart=526:IQ(105|127)+	IQ domain-containing protein IQM1; Involved in the modulation of stomatal movement. Promotes stomatal opening. May play a role in the regulation of chitin signaling. May be involved in biotic and abiotic stress responses	829442	AAL32629.1
AT4G35500	3702.AT4G35500.2	https://smart.embl.de/smart/DDvec.cgi?smart=439:Pfam_Pkinase(38|186)+Pfam_Pkinase_Tyr(248|321)+	Protein kinase superfamily protein; Its function is described as protein serine/threonine kinase activity, protein kinase activity, kinase activity, ATP binding; Involved in protein amino acid phosphorylation; Located in cellular_component unknown; Expressed in 22 plant structures; Expressed during 14 growth stages; Contains the following InterPro domains: Protein kinase, catalytic domain (InterP…	829702	829702
AT4G37810	3702.AT4G37810.1	https://smart.embl.de/smart/DDvec.cgi?smart=128:SIGNAL(1|22)+Pfam_EPF(52|128)+	EPIDERMAL PATTERNING FACTOR-like protein 2; Controls stomatal patterning	829937	829937
AT4G37880	3702.AT4G37880.1	https://smart.embl.de/smart/DDvec.cgi?smart=388:LisH(112|144)+CTLH(150|207)+CRA(203|297)+RING(330|374)+	LisH/CRA/RING-U-box domains-containing protein; Its function is described as zinc ion binding; Involved in biological_process unknown; Located in cellular_component unknown; Expressed in 22 plant structures; Expressed during 13 growth stages; Contains the following InterPro domains: Ran binding protein, CRA domain (InterPro:IPR019589), Zinc finger, RING-type (InterPro:IPR001841), CTLH, C-terminal…	829944	AAV66093.1
VAB2	3702.AT4G38510.5	https://smart.embl.de/smart/DDvec.cgi?smart=494:Pfam_ATP-synt_ab_N(30|96)+Pfam_ATP-synt_ab(153|383)+	ATPase, V1 complex, subunit B protein; Non-catalytic subunit of the peripheral V1 complex of vacuolar ATPase. V-ATPase is responsible for acidifying a variety of intracellular compartments in eukaryotic cells; Belongs to the ATPase alpha/beta chains family	830008	830008
EXO70A1	3702.AT5G03540.3	https://smart.embl.de/smart/DDvec.cgi?smart=664:Pfam_Exo70(294|652)+	Exocyst subunit exo70 family protein A1; Component of the exocyst complex involved in the docking of exocytic vesicles with fusion sites on the plasma membrane during regulated or polarized secretion. Involved in polarized cell growth and organ morphogenesis. Involved in polarized cell growth and organ morphogenesis. During cytokinesis, involved in cell plate initiation, cell plate maturation and…	4RL5	831809
GYRB2	3702.AT5G04130.1	https://smart.embl.de/smart/DDvec.cgi?smart=732:TOP2c(120|723)+	DNA gyrase subunit B, mitochondrial; A type II topoisomerase that negatively supercoils closed circular double-stranded DNA in an ATP-dependent manner	5.99.1.3	830291
KTF1	3702.AT5G04290.1	https://smart.embl.de/smart/DDvec.cgi?smart=1493:Pfam_Spt5-NGN(147|231)+KOW(239|266)+KOW(501|528)+KOW(607|634)+	Kow domain-containing transcription factor 1; Effector of RNA-directed DNA methylation (RdDM) triggered by small interfering RNAs (siRNAs, 24-nt RNAs). Functions as an adapter protein that binds scaffold transcripts generated by polymerase V and recruits AGO4 and AGO4-bound siRNAs to form an RdDM effector complex. Promotes the expression of 24-nt RNAs. Required for the initial establishment of DN…	830308	AED90724.1
AT5G08680	3702.AT5G08680.1	https://smart.embl.de/smart/DDvec.cgi?smart=559:Pfam_Synthase_beta(1|50)+Pfam_ATP-synt_ab_N(89|157)+AAA(226|498)+	ATP synthase subunit beta-3, mitochondrial; Mitochondrial membrane ATP synthase (F(1)F(0) ATP synthase or Complex V) produces ATP from ADP in the presence of a proton gradient across the membrane which is generated by electron transport complexes of the respiratory chain. F-type ATPases consist of two structural domains, F(1) - containing the extramembraneous catalytic core, and F(0) - containing…	3.6.3.14	830769
AT5G09280	3702.AT5G09280.1	https://smart.embl.de/smart/DDvec.cgi?smart=297:PbH1(53|75)+PbH1(84|127)+PbH1(128|149)+PbH1(152|172)+	Pectin lyase-like superfamily protein; Contains the following InterPro domains: Pectin lyase fold/virulence factor (InterPro:IPR011050), AmbAllergen (InterPro:IPR018082), Pectate lyase/Amb allergen (InterPro:IPR002022), Pectin lyase fold (InterPro:IPR012334), Parallel beta-helix repeat (InterPro:IPR006626); BEST Arabidopsis thaliana protein match is: Pectin lyase-like superfamily protein (TAIR:AT…	4.2.2.2	830787
AT5G11610	3702.AT5G11610.1	https://smart.embl.de/smart/DDvec.cgi?smart=546:TRANS(13|35)+Pfam_Exostosin(216|498)+	Uncharacterized protein F15N18_200; Exostosin family protein; Its function is described as catalytic activity; Involved in biological_process unknown; Located in endomembrane system, membrane; Expressed in 6 plant structures; Expressed during LP.06 six leaves visible, LP.04 four leaves visible, LP.10 ten leaves visible, 4 leaf senescence stage; Contains the following InterPro domains: Exostosin-l…	831033	831033
AT5G13070	3702.AT5G13070.1	https://smart.embl.de/smart/DDvec.cgi?smart=183:Pfam_PRELI(16|180)+	Uncharacterized protein T19L5_30; MSF1-like family protein; Contains the following InterPro domains: PRELI/MSF1 (InterPro:IPR006797); Has 1807 Blast hits to 1807 proteins in 277 species: Archae - 0; Bacteria - 0; Metazoa - 736; Fungi - 347; Plants - 385; Viruses - 0; Other Eukaryotes - 339 (source: NCBI BLink)	831146	831146
AT5G14050	3702.AT5G14050.1	https://smart.embl.de/smart/DDvec.cgi?smart=546:COIL(44|66)+WD40(233|272)+WD40(277|316)+WD40(364|402)+WD40(405|445)+WD40(497|539)+	U3 small nucleolar RNA-associated protein 18 homolog; Involved in nucleolar processing of pre-18S ribosomal RNA	831254	831254
ECR1	3702.AT5G19180.1	https://smart.embl.de/smart/DDvec.cgi?smart=454:Pfam_ThiF(28|343)+E2_bind(348|440)+	NEDD8-activating enzyme E1 catalytic subunit; Catalytic subunit of the dimeric ECR1-AXR1 E1 enzyme. E1 activates NEDD8/RUB1 by first adenylating its C-terminal glycine residue with ATP, thereafter linking this residue to the side chain of the catalytic cysteine, yielding a NEDD8-ECR1 thioester and free AMP. E1 finally transfers NEDD8 to the catalytic cysteine of RCE1 (By similarity); Belongs to t…	6.2.1.45	832038
AT5G22320	3702.AT5G22320.1	https://smart.embl.de/smart/DDvec.cgi?smart=452:LRR(40|62)+LRR(106|127)+LRR(128|151)+LRR(174|197)+	Leucine-rich repeat (LRR) family protein; Contains the following InterPro domains: Leucine-rich repeat (InterPro:IPR001611); BEST Arabidopsis thaliana protein match is: Outer arm dynein light chain 1 protein (TAIR:AT4G03260.2); Has 30201 Blast hits to 17322 proteins in 780 species: Archae - 12; Bacteria - 1396; Metazoa - 17338; Fungi - 3422; Plants - 5037; Viruses - 0; Other Eukaryotes - 2996 (so…	832292	832292
AT5G23430	3702.AT5G23430.1	https://smart.embl.de/smart/DDvec.cgi?smart=837:WD40(5|45)+WD40(48|87)+WD40(90|129)+WD40(132|171)+WD40(174|213)+WD40(216|254)+Pfam_Katanin_con80(674|832)+	Katanin p80 WD40 repeat-containing subunit B1 homolog; May participate in a complex which severs microtubules in an ATP-dependent manner. This activity may promote rapid reorganization of cellular microtubule arrays (By similarity); Belongs to the WD repeat KATNB1 family	832409	832409
AT5G37200	3702.AT5G37200.1	https://smart.embl.de/smart/DDvec.cgi?smart=217:RING(159|201)+	RING/U-box superfamily protein; Contains the following InterPro domains: Zinc finger, RING-type (InterPro:IPR001841), Zinc finger, C3HC4 RING-type (InterPro:IPR018957); BEST Arabidopsis thaliana protein match is: RING/U-box superfamily protein (TAIR:AT5G37280.1); Has 1807 Blast hits to 1807 proteins in 277 species: Archae - 0; Bacteria - 0; Metazoa - 736; Fungi - 347; Plants - 385; Viruses - 0; O…	833694	833694
AT5G39670	3702.AT5G39670.1	https://smart.embl.de/smart/DDvec.cgi?smart=204:TRANS(22|44)+EFh(136|164)+EFh(174|202)+	Calcium-binding EF-hand family protein; Potential calcium sensor	833963	833963
SYN2	3702.AT5G40840.2	https://smart.embl.de/smart/DDvec.cgi?smart=810:Pfam_Rad21_Rec8_N(1|106)+Pfam_Rad21_Rec8(752|806)+	Sister chromatid cohesion 1 protein 2; May be involved in sister chromatid cohesion during mitosis	834084	834084
AT5G51440	3702.AT5G51440.1	https://smart.embl.de/smart/DDvec.cgi?smart=210:Pfam_HSP20(112|210)+	23.5 kDa heat shock protein, mitochondrial; HSP20-like chaperones superfamily protein; Contains the following InterPro domains: Heat shock protein Hsp20 (InterPro:IPR002068), HSP20-like chaperone (InterPro:IPR008978); BEST Arabidopsis thaliana protein match is: mitochondrion-localized small heat shock protein 23.6 (TAIR:AT4G25200.1); Has 3995 Blast hits to 3995 proteins in 1037 species: Archae - …	23.5 kDa heat shock protein, mitochondrial	23.5 kDa heat shock protein, mitochondrial
AT5G55660	3702.AT5G55660.1	https://smart.embl.de/smart/DDvec.cgi?smart=778:COIL(187|300)+COIL(526|591)+Pfam_DEK_C(686|739)+	DEK domain-containing chromatin associated protein; Contains the following InterPro domains: DEK, C-terminal (InterPro:IPR014876); BEST Arabidopsis thaliana protein match is: DEK domain-containing chromatin associated protein (TAIR:AT4G26630.2); Has 1807 Blast hits to 1807 proteins in 277 species: Archae - 0; Bacteria - 0; Metazoa - 736; Fungi - 347; Plants - 385; Viruses - 0; Other Eukaryotes - …	835660	835660
AT5G57770	3702.AT5G57770.1	https://smart.embl.de/smart/DDvec.cgi?smart=406:Pfam_Auxin_canalis(17|269)+Pfam_PH_2(288|391)+	Contains the following InterPro domains: Pleckstrin-like, plant (InterPro:IPR013666), Protein of unknown function DUF828 (InterPro:IPR008546); BEST Arabidopsis thaliana protein match is: Plant protein of unknown function (DUF828) with plant pleckstrin homology-like region (TAIR:AT3G22810.1); Has 171 Blast hits to 171 proteins in 15 species: Archae - 0; Bacteria - 2; Metazoa - 0; Fungi - 0; Plants…	835885	835885
STR18	3702.AT5G66170.2	https://smart.embl.de/smart/DDvec.cgi?smart=138:RHOD(17|127)+	Thiosulfate sulfurtransferase 18; Catalyzes the transfer of a sulfur ion from a donor to cyanide or to other thiol compounds. Substrate preference is thiosulfate > 3-mercaptopyruvate	836749	836749
CPK28	3702.AT5G66210.1	https://smart.embl.de/smart/DDvec.cgi?smart=523:S_TKc(62|322)+EFh(369|397)+EFh(406|434)+EFh(448|476)+EFh(478|506)+	Calcium-dependent protein kinase 28; May play a role in signal transduction pathways that involve calcium as a second messenger (Probable). Acts as developmentally controlled regulator for coordinated stem elongation and vascular development. Acts as key component which contributes to the developmental switch that establishes the transition from vegetative to reproductive growth. Involved in path…	2.7.11.1	836753
MATK	3702.ATCG00040.1	https://smart.embl.de/smart/DDvec.cgi?smart=526:Pfam_MatK_N(23|353)+Pfam_Intron_maturas2(380|505)+	Maturase K; Usually encoded in the trnK tRNA gene intron. Probably assists in splicing its own and other chloroplast group II introns	844797	844797
ATPA	3702.ATCG00120.1	https://smart.embl.de/smart/DDvec.cgi?smart=507:Pfam_ATP-synt_ab_N(26|93)+Pfam_ATP-synt_ab(150|365)+Pfam_ATP-synt_ab_C(372|497)+	Encodes the ATPase alpha subunit, which is a subunit of ATP synthase and part of the CF1 portion which catalyzes the conversion of ADP to ATP using the proton motive force. This complex is located in the thylakoid membrane of the chloroplast; Belongs to the ATPase alpha/beta chains family	3.6.3.14	844790
rps14	3702.ATCG00330.1	https://smart.embl.de/smart/DDvec.cgi?smart=100:Pfam_Ribosomal_S14(46|99)+	30S ribosomal protein S14, chloroplastic; Binds 16S rRNA, required for the assembly of 30S particles; Belongs to the universal ribosomal protein uS14 family	30S ribosomal protein S14	30S ribosomal protein S14, chloroplastic
ATPE	3702.ATCG00470.1	https://smart.embl.de/smart/DDvec.cgi?smart=132:Pfam_ATP-synt_DE_N(3|81)+Pfam_ATP-synt_DE(85|130)+	ATP synthase epsilon chain, chloroplastic; Produces ATP from ADP in the presence of a proton gradient across the membrane	844758	844758
PB	3702.ATCG00480.1	https://smart.embl.de/smart/DDvec.cgi?smart=498:Pfam_ATP-synt_ab_N(23|95)+AAA(164|356)+	ATP synthase subunit beta, chloroplastic; Produces ATP from ADP in the presence of a proton gradient across the membrane. The catalytic sites are hosted primarily by the beta subunits; Belongs to the ATPase alpha/beta chains family	3.6.3.14	844757
RBCL	3702.ATCG00490.1	https://smart.embl.de/smart/DDvec.cgi?smart=479:Pfam_RuBisCO_large_N(23|144)+Pfam_RuBisCO_large(154|462)+	Ribulose bisphosphate carboxylase large chain; RuBisCO catalyzes two reactions: the carboxylation of D- ribulose 1,5-bisphosphate, the primary event in carbon dioxide fixation, as well as the oxidative fragmentation of the pentose substrate in the photorespiration process. Both reactions occur simultaneously and in competition at the same active site; Belongs to the RuBisCO large chain family. Ty…	4.1.1.39	5IU0
